# Supplementary material
Source: PubMed Central journal article supplement (PMC4136129)
Supplement: JCM.00694-14_zjm999093588so1.pdf [file JCM.00694-14_zjm999093588so1.pdf]

**Table S1. Susceptibility test data on strains used in this study.**

| Isolate                   | AMC   | AMP | ATM | CFZ | FEP | CTX | FOX | CRO | ETP  | IMP | MEM | DPM | TZP   |
|---------------------------|-------|-----|-----|-----|-----|-----|-----|-----|------|-----|-----|-----|-------|
| R1: <i>K. pneumoniae</i>  | >16/8 | >16 | >16 | >16 | >16 | >32 | >16 | >32 | >4   | >8  | >8  | -   | >64/4 |
| R2: <i>K. pneumoniae</i>  | >16/8 | >16 | >16 | >16 | ≤1  | >32 | >16 | >32 | >4   | >8  | >8  | -   | >64/4 |
| R3: <i>K. pneumoniae</i>  | >16/8 | >16 | >16 | >16 | >16 | >32 | >16 | >32 | >4   | >8  | >8  | -   | >64/4 |
| R4: <i>K. pneumoniae</i>  | >16/8 | >16 | >16 | >16 | >16 | >32 | >16 | >32 | >4   | 8   | >8  | -   | >64/4 |
| R5: <i>K. pneumoniae</i>  | >16/8 | >16 | >16 | >16 | >16 | >32 | >16 | >32 | >4   | >8  | >8  | -   | >64/4 |
| R6: <i>K. pneumoniae</i>  | >16/8 | >16 | >16 | >16 | >16 | >32 | >16 | >32 | >4   | >8  | >8  | -   | >64/4 |
| R7: <i>K. pneumoniae</i>  | >16/8 | >16 | >16 | >16 | >16 | >32 | >16 | >32 | >4   | >8  | >8  | -   | >64/4 |
| R8: <i>K. pneumoniae</i>  | >16/8 | >16 | >16 | >16 | >16 | >32 | >16 | >32 | >4   | >8  | >8  | -   | >64/4 |
| R9: <i>K. pneumoniae</i>  | >16/8 | >16 | >16 | >16 | >16 | >32 | >16 | >32 | >4   | >8  | >8  | -   | >64/4 |
| R10: <i>K. pneumoniae</i> | >16/8 | >16 | >16 | >16 | >16 | >32 | >16 | >32 | >4   | >8  | >8  | -   | >64/4 |
| R11: <i>K. pneumoniae</i> | >16/8 | >16 | >16 | >16 | >16 | >32 | >16 | >32 | >4   | >8  | >8  | -   | >64/4 |
| R12: <i>K. pneumoniae</i> | >16/8 | >16 | >16 | >16 | >16 | 32  | >16 | >32 | >4   | 8   | >8  | -   | >64/4 |
| R13: <i>K. pneumoniae</i> | >16/8 | >16 | >16 | >16 | >16 | >32 | >16 | >32 | >4   | >8  | >8  | -   | >64/4 |
| R14: <i>K. pneumoniae</i> | >16/8 | >16 | >16 | >16 | >16 | >32 | >16 | >32 | >4   | >8  | >8  | -   | >64/4 |
| R15: <i>K. pneumoniae</i> | >16/8 | >16 | >16 | >16 | >16 | >32 | >16 | >32 | >4   | >8  | >8  | -   | >64/4 |
| R16: <i>K. pneumoniae</i> | >16/8 | >16 | >16 | >16 | >16 | >32 | >16 | >32 | >4   | >8  | >8  | -   | >64/4 |
| R17: <i>K. pneumoniae</i> | >16/8 | >16 | >16 | >16 | >16 | >32 | >16 | >32 | >4   | >8  | >8  | -   | >64/4 |
| R18: <i>K. pneumoniae</i> | >16/8 | >16 | >16 | >16 | >16 | >32 | >16 | >32 | >4   | >8  | >8  | -   | >64/4 |
| S1: <i>K. pneumoniae</i>  | ≤4/2  | 16  | ≤2  | ≤2  | ≤1  | -   | ≤4  | -   | ≤0.5 | ≤1  | ≤1  | -   | 8/4   |
| S2: <i>K. pneumoniae</i>  | ≤4/2  | >16 | ≤2  | ≤2  | ≤1  | -   | ≤4  | -   | ≤0.5 | ≤1  | ≤1  | -   | 4/4   |
| S3: <i>K. pneumoniae</i>  | ≤4/2  | >16 | ≤2  | ≤2  | ≤1  | -   | ≤4  | -   | ≤0.5 | ≤1  | ≤1  | -   | 4/4   |
| S4: <i>K. pneumoniae</i>  | ≤4/2  | >16 | ≤2  | ≤2  | ≤1  | -   | ≤4  | -   | ≤0.5 | ≤1  | ≤1  | -   | 4/4   |
| S5: <i>K. pneumoniae</i>  | ≤4/2  | >16 | ≤2  | ≤2  | ≤1  | -   | ≤4  | -   | ≤0.5 | ≤1  | ≤1  | -   | 8/4   |
| S6: <i>K. pneumoniae</i>  | ≤4/2  | >16 | ≤2  | ≤2  | ≤1  | -   | ≤4  | -   | ≤0.5 | ≤1  | ≤1  | -   | 4/4   |
| S7: <i>K. pneumoniae</i>  | ≤4/2  | 16  | ≤2  | ≤2  | ≤1  | -   | ≤4  | -   | ≤0.5 | ≤1  | ≤1  | -   | ≤2/4  |
| S8: <i>K. pneumoniae</i>  | ≤4/2  | >16 | ≤2  | ≤2  | ≤1  | -   | ≤4  | -   | ≤0.5 | ≤1  | ≤1  | -   | 8/4   |
| S9: <i>K. pneumoniae</i>  | ≤4/2  | 8   | ≤2  | ≤2  | ≤1  | -   | ≤4  | -   | ≤0.5 | ≤1  | ≤1  | -   | ≤2/4  |
| S10: <i>K. pneumoniae</i> | ≤4/2  | >16 | ≤2  | ≤2  | ≤1  | -   | ≤4  | -   | ≤0.5 | ≤1  | ≤1  | -   | 4/4   |
| S11: <i>K. pneumoniae</i> | ≤4/2  | 16  | ≤2  | ≤2  | ≤1  | -   | ≤4  | -   | ≤0.5 | ≤1  | ≤1  | -   | 4/4   |
| S12: <i>K. pneumoniae</i> | ≤4/2  | >16 | ≤2  | ≤2  | ≤1  | -   | ≤4  | -   | ≤0.5 | ≤1  | ≤1  | -   | 4/4   |
| S13: <i>K. pneumoniae</i> | ≤4/2  | >16 | ≤2  | ≤2  | ≤1  | -   | ≤4  | -   | ≤0.5 | ≤1  | ≤1  | -   | 4/4   |
| S14: <i>K. pneumoniae</i> | ≤4/2  | 8   | ≤2  | ≤2  | ≤1  | -   | ≤4  | -   | ≤0.5 | ≤1  | ≤1  | -   | 4/4   |
| S15: <i>K. pneumoniae</i> | ≤4/2  | 16  | ≤2  | ≤2  | ≤1  | -   | ≤4  | -   | ≤0.5 | ≤1  | ≤1  | -   | 8/4   |
| S16: <i>K. pneumoniae</i> | ≤4/2  | >16 | ≤2  | ≤2  | ≤1  | -   | ≤4  | -   | ≤0.5 | ≤1  | ≤1  | -   | ≤2/4  |
| S17: <i>K. pneumoniae</i> | ≤4/2  | >16 | ≤2  | ≤2  | ≤1  | -   | ≤4  | -   | ≤0.5 | ≤1  | ≤1  | -   | ≤2/4  |
| S18: <i>K. pneumoniae</i> | ≤4/2  | 16  | ≤2  | ≤2  | ≤1  | -   | ≤4  | -   | ≤0.5 | ≤1  | ≤1  | -   | 4/4   |
| A1: <i>K. pneumoniae</i>  | -     | -   | -   | -   | -   | -   | -   | -   | NZ   | 27  | 17  | 22  | -     |
| A2: <i>E. coli</i>        | -     | -   | -   | -   | -   | -   | -   | -   | 10   | 24  | 18  | 23  | -     |
| A3: <i>K. pneumoniae</i>  | -     | -   | -   | -   | -   | -   | -   | -   | NZ   | NZ  | NZ  | NZ  | -     |
| A4: <i>K. pneumoniae</i>  | -     | -   | -   | -   | -   | -   | -   | -   | NZ   | NZ  | NZ  | NZ  | -     |
| A5: <i>S. marcescens</i>  | -     | -   | -   | -   | -   | -   | -   | -   | 20   | NZ  | 17  | 16  | -     |

|                                 |       |     |     |     |     |     |     |     |       |     |     |    |       |
|---------------------------------|-------|-----|-----|-----|-----|-----|-----|-----|-------|-----|-----|----|-------|
| A6: <i>E. coli</i>              | -     | -   | -   | -   | -   | -   | -   | -   | 10    | 22  | 15  | 19 | -     |
| A7: <i>K. pneumoniae</i>        | -     | -   | -   | -   | -   | -   | -   | -   | 19    | 25  | 10  | 14 | -     |
| A8: <i>E. coli</i>              | -     | -   | -   | -   | -   | -   | -   | -   | 12    | 29  | 15  | 19 | -     |
| A9: <i>K. pneumoniae</i>        | -     | -   | -   | -   | -   | -   | -   | -   | 12    | 28  | 20  | 25 | -     |
| A10: <i>E. aerogenes</i>        | -     | -   | -   | -   | -   | -   | -   | -   | NZ    | 16  | 16  | 21 | -     |
| A11: <i>S. marcescens</i>       | -     | -   | -   | -   | -   | -   | -   | -   | 22    | NZ  | 18  | 18 | -     |
| A12: <i>K. pneumoniae</i>       | -     | -   | -   | -   | -   | -   | -   | -   | 10    | 25  | NZ  | 20 | -     |
| A13: <i>K. pneumoniae</i>       | -     | -   | -   | -   | -   | -   | -   | -   | 10    | 28  | 16  | 23 | -     |
| A14: <i>E. coli</i>             | -     | -   | -   | -   | -   | -   | -   | -   | NZ    | 28  | 18  | 23 | -     |
| A15: <i>E. coli</i>             | -     | -   | -   | -   | -   | -   | -   | -   | NZ    | 28  | 18  | 23 | -     |
| A16: <i>Serratia</i> sp.        | -     | -   | -   | -   | -   | -   | -   | -   | 14    | NZ  | 15  | 13 | -     |
| A17: <i>E. coli</i>             | -     | -   | -   | -   | -   | -   | -   | -   | NZ    | 24  | 17  | 18 | -     |
| A18: <i>C. freundii</i> complex | -     | -   | -   | -   | -   | -   | -   | -   | 14    | 20  | 27  | 28 | -     |
| A19: <i>E. coli</i>             | -     | -   | -   | -   | -   | -   | -   | -   | NZ    | 26  | 15  | 22 | -     |
| A20: <i>E. coli</i>             | -     | -   | -   | -   | -   | -   | -   | -   | NZ    | 26  | 18  | 21 | -     |
| A21: <i>E. cloacae</i> complex  | -     | -   | -   | -   | -   | -   | -   | -   | 18    | 20  | 21  | 24 | -     |
| A22: <i>E. cloacae</i> complex  | -     | -   | -   | -   | -   | -   | -   | -   | NZ    | 21  | 14  | 20 | -     |
| A23: <i>E. cloacae</i> complex  | -     | -   | -   | -   | -   | -   | -   | -   | NZ    | 12  | 11  | 14 | -     |
| A24: <i>E. cloacae</i> complex  | -     | -   | -   | -   | -   | -   | -   | -   | 10    | 20  | 17  | 21 | -     |
| A25: <i>E. coli</i>             | -     | -   | -   | -   | -   | -   | -   | -   | NZ    | 22  | 15  | 20 | -     |
| A26: <i>E. coli</i>             | -     | -   | -   | -   | -   | -   | -   | -   | NZ    | 25  | 16  | 20 | -     |
| ATCC BAA1705                    | >16/8 | >16 | >16 | >16 | >16 | >32 | >16 | >32 | >4    | 8   | 8   | -  | >64/4 |
| ATCC BAA1706                    | <=4/2 | >16 | <=2 | >16 | <=1 | -   | >16 | -   | 20    | 22  | 25  | -  | 8/4   |
| C1: Fig 1A (shown)              | >16/8 | >16 | >16 | >16 | >16 | >32 | >16 | >32 | >4    | >8  | >8  | -  | >64/4 |
| C2: Fig 1B (shown)              | <=4/2 | >16 | <=2 | -   | <=1 | -   | >16 | -   | <=0.5 | <=1 | <=1 | -  | 8/4   |
| C3: Fig 1C (shown)              | >16/8 | >16 | >16 | >16 | >16 | >32 | >16 | >32 | >4    | >8  | >8  | -  | >64/4 |
| C4: Fig 1A (not shown)          | >16/8 | >16 | >16 | >16 | >16 | >32 | >16 | >32 | >4    | >8  | >8  | -  | >64/4 |
| C5: Fig 1B (not shown)          | <=4/2 | >16 | <=2 | >16 | <=1 | -   | >16 | -   | <=0.5 | <=1 | <=1 | -  | 8/4   |
| C6: Fig 1C (not shown)          | >16/8 | >16 | >16 | >16 | >16 | >32 | >16 | >32 | >4    | >8  | >8  | -  | >64/4 |
| C9: Figure 1D                   | <=4/2 | >16 | <=2 | <=2 | <=1 | -   | 8   | -   | <=0.5 | <=1 | <=1 | -  | 4/4   |
| C10: Figure 1E                  | >16/8 | >16 | >16 | >16 | >16 | 32  | >16 | >32 | >4    | 8   | 8   | -  | >64/4 |
| C7: Fig 1F                      | 8/4   | <=4 | <=2 | 8   | <=1 | -   | 16  | -   | <=0.5 | <=1 | <=1 | -  | <=2/4 |
| C8: Fig 1G                      | >16/8 | >16 | <=2 | >16 | -   | 32  | >16 | >32 | <=0.5 | 4   | 20  | -  | >64/4 |

R1-R18 represent 2011 NIH Clinical Center outbreak isolates. S1-S18 represent comparator *bla<sub>KPC</sub>*-negative, carbapenem-susceptible clinical *K. pneumoniae* isolates. A1-A26 represent comparator *bla<sub>KPC</sub>*-negative, carbapenem-resistant isolates (defined as I or R to at least 2 carbapenems). C1-C10 are isolates used in the plasmid elimination/transformation experiments represented in Figure 3. C1-C3 are data shown in Figure 3A-C, and C4-6 are the susceptibilities on the second isolate mentioned in the text, performed in parallel (spectral data not shown). R1-R18, S1-S18, and C1-C10 isolates were tested by broth microdilution methods, with the exception of meropenem testing on isolate C8, which was performed by Kirby Bauer disk diffusion. Isolates A1-A26 and ATCC BAA1706 were tested by Kirby Bauer disk diffusion and numbers represent zone size in mm. NZ = no zone of inhibition around disk. Abbreviations: AMC = amoxicillin/clavulanic acid; AMP = ampicillin; ATM = aztreonam; CFZ = cefazolin; FEP = cefepime; CTX = cefotaxime; FOX = ceftiofloxacin; CRO = ceftriaxone; ETP = ertapenem; IMP = imipenem; MEM = meropenem; DPM = doripenem; TZP = piperacillin/tazobactam. Color code indicates susceptibility interpretations per 2013 CLSI standards (**Clinical and Laboratory Standards Institute**. 2013. Performance Standards for Antimicrobial Susceptibility Testing; Twenty-Third Informational Supplement: M100-S23.): Red = Resistant; Yellow = Intermediate; Green = Susceptible.
